# Supplementary material for: A Combinatorial Safety Analysis of Cruise Ship Diesel–Electric Propulsion Plant Blackout
Source: MDPI journal article supplement (doi:10.3390/safety7020038), 2021-05-14
Supplement: s1 [file s1]

Supplementary Material

| a/a | Failure                                         | $\lambda$ [hour <sup>-1</sup> ] | Source | $\beta$ [-] | source for $\beta$ factors | DEP subsystem |
|-----|-------------------------------------------------|---------------------------------|--------|-------------|----------------------------|---------------|
| 1   | Earth faults in D/G set                         | 2.79E-06                        | [1]    | 1.3         | [2]                        | D/G set       |
| 2   | Overcurrent in D/G set                          | 2.79E-06                        | [1]    | 1.3         | [2]                        | D/G set       |
| 3   | Differential current fault in D/G set           | 2.79E-06                        | [1]    | 1.3         | [2]                        | D/G set       |
| 4   | Short circuit in D/G sets                       | 2.79E-06                        | [1]    | 1.3         | [2]                        | D/G set       |
| 5   | Engine failure                                  | 1.77E-03                        | [1]    | 1           | No data                    | D/G set       |
| 6   | Failure to start on demand the engine           | 1.80E-03                        | [1]    | NA          | NA                         | D/G set       |
| 7   | Failure to start on demand the generator        | 4.80E-03                        | [1]    | NA          | NA                         | D/G set       |
| 8   | D/G set thrust bearings failure                 | 2.78E-06                        | [1]    | 1.3         | [2]                        | D/G set       |
| 9   | D/G set main bearings failure                   | 2.78E-06                        | [1]    | 1.3         | [2]                        | D/G set       |
| 10  | Water pipelines on engine failure               | 1.18E-05                        | [1]    | 1.24        | [3]                        | D/G set       |
| 11  | Engine air supply failure                       | 3.01E-06                        | [1]    | 1           | No data                    | D/G set       |
| 12  | Lubricating oil pipelines failure               | 7.47E-08                        | [1]    | 1.24        | [3]                        | D/G set       |
| 13  | Lubricating oil filter failure                  | 3.35E-10                        | [1]    | 1.1         | [2]                        | D/G set       |
| 14  | High lub oil mist presence in engine cranckcase | 1.72E-05                        | [1]    | 1.24        | [2]                        | D/G set       |
| 15  | Turbocharger failure                            | 4.74E-09                        | [1]    | 1.3         | [2]                        | D/G set       |
| 16  | Engine exhaust valves failure                   | 1.87E-08                        | [1]    | 2.23        | [4]                        | D/G set       |
| 17  | Engine injection system failure                 | 2.34E-08                        | [1]    | 1.552       | [5]                        | D/G set       |
| 18  | D/G set controller hardware failure             | 3.77E-06                        | [1]    | NA          | NA                         | D/G set       |

|    |                                                                                      |          |     |    |    |         |
|----|--------------------------------------------------------------------------------------|----------|-----|----|----|---------|
| 19 | D/G set controller not starting the D/G set when required                            | 5.00E-05 | [6] | NA | NA | D/G set |
| 20 | D/G set controller not synchronising the D/G set when required                       | 1.00E-05 | [6] | NA | NA | D/G set |
| 21 | D/G set controller implementing extra attempts to synchronise                        | 1.00E-05 | [6] | NA | NA | D/G set |
| 22 | D/G set controller not coordinating AVR and D/G set controller as required           | 1.00E-05 | [6] | NA | NA | D/G set |
| 23 | D/G set controller software faulty failure to coordinate Governor and D/G controller | 1.00E-05 | [6] | NA | NA | D/G set |
| 24 | D/G set controller implementing wrong starting sequence                              | 1.00E-05 | [6] | NA | NA | D/G set |
| 25 | D/G set controller starting D/G set longer than required                             | 1.00E-05 | [6] | NA | NA | D/G set |
| 26 | D/G set controller providing wrong reference speed during start                      | 1.00E-05 | [6] | NA | NA | D/G set |
| 27 | D/G set controller providing too fast speed increase command                         | 1.00E-05 | [6] | NA | NA | D/G set |
| 28 | D/G controller communication lines failure                                           | 2.50E-08 | [7] | NA | NA | D/G set |
| 29 | Generator frequency sensors failure                                                  | 1.19E-06 | [1] | NA | NA | D/G set |
| 30 | Turning gear status sensor failure                                                   | 1.40E-06 | [6] | NA | NA | D/G set |
| 31 | Fuel temperature sensor failure                                                      | 3.77E-06 | [1] | NA | NA | D/G set |
| 32 | Fuel pressure sensor failure                                                         | 1.25E-06 | [1] | NA | NA | D/G set |
| 33 | Lubricating oil level sensor failure                                                 | 1.40E-06 | [6] | NA | NA | D/G set |
| 34 | Air starting system air pressure sensors failure                                     | 5.32E-06 | [1] | NA | NA | D/G set |
| 35 | Governor hardware faulty                                                             | 3.77E-06 | [1] | NA | NA | D/G set |
| 36 | Governor not responding to changes                                                   | 1.00E-06 | [8] | NA | NA | D/G set |
| 37 | Governor fails to synchronise to network                                             | 1.00E-06 | [8] | NA | NA | D/G set |
| 38 | Governor communication lines failure                                                 | 2.50E-08 | [7] | NA | NA | D/G set |
| 39 | Governor speed sensors erroneous measurement                                         | 1.18E-05 | [1] | NA | NA | D/G set |

|    |                                                                        |          |     |     |         |         |
|----|------------------------------------------------------------------------|----------|-----|-----|---------|---------|
| 40 | Governor fuel rack pumps failure                                       | #REF!    | [1] | 1.1 | [2]     | D/G set |
| 41 | Governor fuel limiter failure                                          | 6.27E-07 | [1] | NA  | NA      | D/G set |
| 42 | AVR fails to synchronise to network                                    | 1.00E-06 | [8] | NA  | NA      | D/G set |
| 43 | AVR does not change the voltage level when required                    | 1.00E-06 | [8] | NA  | NA      | D/G set |
| 44 | AVR voltage sensor erroneous measurement                               | 5.08E-07 | [1] | NA  | NA      | D/G set |
| 45 | AVR hardware failure                                                   | 1.11E-05 | [1] | NA  | NA      | D/G set |
| 46 | AVR excitation bridge failure                                          | 2.63E-07 | [1] | 1   | No data | D/G set |
| 47 | AVR communication failure                                              | 2.50E-08 | [7] | NA  | NA      | D/G set |
| 48 | Engine safety system hardware failure                                  | 1.00E-05 | [6] | NA  | NA      | D/G set |
| 49 | Engine safety system fault tripping of engine                          | 1.00E-05 | [6] | NA  | NA      | D/G set |
| 50 | Engine safety system not tripping the D/G set when required            | 5.00E-04 | [6] | NA  | NA      | D/G set |
| 51 | Engine safety system tripping the D/G set with delay when required     | 5.00E-04 | [6] | NA  | NA      | D/G set |
| 52 | Engine safety sytem lubricating oil pressure sensors failure           | 1.25E-06 | [1] | NA  | NA      | D/G set |
| 53 | Engine safetys system high thrust bearings temperature sensors failure | 3.77E-06 | [1] | NA  | NA      | D/G set |
| 54 | Engine safety system cooling water temperature sensors failure         | 3.77E-06 | [1] | NA  | NA      | D/G set |
| 55 | Engine safety system exhaust gas temperature sensors failure           | 3.77E-06 | [1] | NA  | NA      | D/G set |
| 56 | Engine safety system main bearings temperature sensors failure         | 3.77E-06 | [1] | NA  | NA      | D/G set |
| 57 | Engine safety system oil mist detector sensor failure                  | 5.80E-07 | [9] | NA  | NA      | D/G set |
| 58 | Engine safety system speed sensor failure                              | 1.88E-06 | [1] | NA  | NA      | D/G set |
| 59 | Engine safety system actuator failure                                  | 1.30E-06 | [6] | 1.1 | [2]     | D/G set |
| 60 | Engine safety system communication failure                             | 2.50E-08 | [7] | NA  | NA      | D/G set |

|    |                                                                                            |          |                               |       |         |                          |
|----|--------------------------------------------------------------------------------------------|----------|-------------------------------|-------|---------|--------------------------|
| 61 | Generator safety system hardware failure                                                   | 1.00E-05 | [6]                           | NA    | NA      | D/G set                  |
| 62 | Generator safety system not tripping the D/G set when required                             | 5.00E-04 | [6]                           | NA    | NA      | D/G set                  |
| 63 | Generator safety system generator faulty tripping                                          | 1.00E-05 | [6]                           | NA    | NA      | D/G set                  |
| 64 | Generator safety system current sensor failure                                             | 5.32E-07 | [10]                          | NA    | NA      | D/G set                  |
| 65 | Generator safety system frequency sensor failure                                           | 8.82E-07 | [1]                           | NA    | NA      | D/G set                  |
| 66 | Cylinders failure                                                                          | 1.68E-10 | [1]                           | NA    | NA      | D/G set                  |
| 67 | D/G set fuel pump failure                                                                  | 3.35E-10 | [1]                           | NA    | NA      | D/G set                  |
| 68 | D/G set shaft failure                                                                      | 1.68E-10 | [1]                           | NA    | NA      | D/G set                  |
| 69 | Engine piston failure                                                                      | 2.61E-06 | [11]                          | 1.552 | [5]     | D/G set                  |
| 70 | Governor speed sensors failure                                                             | 2.37E-05 | [1]                           | NA    | NA      | D/G set                  |
| 71 | AVR voltage sensor failure                                                                 | 5.08E-07 | [1]                           | NA    | NA      | D/G set                  |
| 72 | Engine safety system faulty tripping the engine due to alleged high oil mist concentration | 7.39E-06 | Accident investigation report | 1     | No data | D/G set                  |
| 73 | Failure of current sensors on D/G set                                                      | 5.32E-07 | [10]                          | NA    | NA      | D/G set                  |
| 74 | Failure of voltage sensors on D/G set                                                      | 6.73E-07 | [1]                           | NA    | NA      | D/G set                  |
| 75 | Lubricating oil pump failure                                                               | 1.01E-11 | [1]                           | 1.2   | [2]     | Engine auxilliary system |
| 76 | Starting air system failure                                                                | 6.28E-06 | [1]                           | 1     | No data | Engine auxilliary system |
| 77 | Fuel supply system during start failure                                                    | 6.27E-07 | [1]                           | 1     | No data | Engine auxilliary system |
| 78 | Water cooler failure                                                                       | 2.51E-06 | [1]                           | 1.88  | [12]    | Engine auxilliary system |

|    |                                                      |          |                               |       |      |                          |
|----|------------------------------------------------------|----------|-------------------------------|-------|------|--------------------------|
| 79 | Fuel pipes failure                                   | 1.34E-05 | [1]                           | 1.24  | [3]  | Engine auxilliary system |
| 80 | Engine fuel filter failure                           | 3.35E-10 | [1]                           | 1.1   | [2]  | Engine auxilliary system |
| 81 | Engine high temperature water pump failure           | 3.02E-05 | [1]                           | 1.2   | [2]  | Engine auxilliary system |
| 82 | Engine low temperature water pump failure            | 3.02E-05 | [1]                           | 1.2   | [2]  | Engine auxilliary system |
| 83 | Generator low temperature water pump failure         | 1.02E-06 | [1]                           | 1.2   | [2]  | Engine auxilliary system |
| 84 | Oil cooler failure                                   | 1.34E-05 | [1]                           | 1.88  | [12] | Engine auxilliary system |
| 85 | Fuel supply pump failure                             | 7.56E-06 | [13]                          | 1.2   | [2]  | Engine auxilliary system |
| 86 | Fuel filter in supply system failure                 | 6.96E-06 | [13]                          | 1.1   | [2]  | Engine auxilliary system |
| 87 | Fuel heater failure                                  | 4.27E-06 | [13]                          | 1.552 | [5]  | Engine auxilliary system |
| 88 | Fuel booster pump failure                            | 8.28E-06 | [13]                          | 1.2   | [2]  | Engine auxilliary system |
| 89 | Sea chest clogged                                    | 7.00E-04 | [14]                          | 1.3   | [2]  | Engine auxilliary system |
| 90 | Quick fuel valve faulty tripping                     | 1.00E-05 | [6]                           | NA    | NA   | Engine auxilliary system |
| 91 | Electrical transient is not acceptable by the system | 3.35E-08 | Accident investigation report | NA    | NA   | General                  |
| 92 | Fire in engine room                                  | 6.60E-07 | [15, 16]                      | NA    | NA   | General                  |
| 93 | Failure in communication lines                       | 2.50E-08 | [7]                           | NA    | NA   | General                  |

|     |                                                                                              |          |            |      |      |                       |
|-----|----------------------------------------------------------------------------------------------|----------|------------|------|------|-----------------------|
| 94  | Intelligent diagnosis does not identify and correct load sharing                             | 1.00E-02 | Assumption | NA   | NA   | Intelligent Diagnosis |
| 95  | Failure of Intelligent Diagnosis hardware                                                    | 3.02E-05 | [1]        | NA   | NA   | Intelligent Diagnosis |
| 96  | Short circuit in air conditioning motors                                                     | 3.28E-07 | [1]        | 1.3  | [2]  | Other                 |
| 97  | Arc in switchboards                                                                          | 1.14E-08 | [17]       | 1.3  | [2]  | Other                 |
| 98  | Short circuits in transformers                                                               | 4.81E-07 | [7, 18]    | 1.3  | [2]  | Other                 |
| 99  | D/G set, Bus-Tie, Air conditioning motors, Bow Thrusters circuit breaker not operating       | 2.50E-06 | [19]       | NA   | NA   | Other                 |
| 100 | D/G set, Bus-Tie, Air conditioning motors, Bow Thrusters, circuit breaker spurious operation | 1.20E-06 | [19]       | NA   | NA   | Other                 |
| 101 | Transformer failure                                                                          | 1.75E-06 | [7]        | 1.93 | [20] | Other                 |
| 102 | Arc protection hardware failure                                                              | 1.50E-05 | [1]        | NA   | NA   | Other                 |
| 103 | Arc protection software not operating                                                        | 5.00E-04 | [6]        | NA   | NA   | Other                 |
| 104 | Arc protection sensors failure                                                               | 5.80E-07 | [9]        | NA   | NA   | Other                 |
| 105 | Fault tripping of arc protection                                                             | 1.50E-05 | [1]        | NA   | NA   | Other                 |
| 106 | PMS hardware faulty                                                                          | 1.50E-05 | [6]        | NA   | NA   | PMS                   |
| 107 | Failure to reduce the propulsion motors load                                                 | 5.00E-05 | [6]        | NA   | NA   | PMS                   |
| 108 | Failure to reduce the propulsion motors load in time                                         | 5.00E-05 | [6]        | NA   | NA   | PMS                   |
| 109 | Failure to trip heavy consumers                                                              | 5.00E-05 | [6]        | NA   | NA   | PMS                   |
| 110 | Fault tripping of propulsion motors                                                          | 1.00E-05 | [6]        | NA   | NA   | PMS                   |
| 111 | PMS Failure to start a D/G when required                                                     | 1.00E-05 | [6]        | NA   | NA   | PMS                   |
| 112 | PMS starting an already running D/G set                                                      | 1.00E-05 | [6]        | NA   | NA   | PMS                   |
| 113 | PMS starting a faulty D/G set                                                                | 1.00E-05 | [6]        | NA   | NA   | PMS                   |

|     |                                                                                                       |          |     |     |     |                   |
|-----|-------------------------------------------------------------------------------------------------------|----------|-----|-----|-----|-------------------|
| 114 | PMS stopping D/G set without other set allocation                                                     | 1.00E-05 | [6] | NA  | NA  | PMS               |
| 115 | PMS connecting bus-tie breaker to a section with electrical fault                                     | 1.00E-05 | [6] | NA  | NA  | PMS               |
| 116 | PMS starting a D/G set with delay                                                                     | 5.00E-05 | [6] | NA  | NA  | PMS               |
| 117 | PMS allowing load increase, when inadequate D/G set number is connected                               | 1.00E-06 | [6] | NA  | NA  | PMS               |
| 118 | Short circuit in propulsion motors or bow thrusters                                                   | 3.28E-07 | [1] | 1.3 | [2] | Propulsion motors |
| 119 | Overcurrent in propulsion motors                                                                      | 2.79E-06 | [1] | 1.3 | [2] | Propulsion motors |
| 120 | Differential current fault in propulsion motors                                                       | 2.79E-06 | [1] | 1.3 | [2] | Propulsion motors |
| 121 | Application controller not reducing propulsion motors load during D/G sets overload conditions        | 5.00E-05 | [6] | NA  | NA  | Propulsion motors |
| 122 | Application controller generates unacceptable electrical transients during start of propulsion motors | 5.00E-05 | [6] | NA  | NA  | Propulsion motors |
| 123 | Application controller not timely reducing propulsion motors load during D/G sets overload conditions | 5.00E-05 | [6] | NA  | NA  | Propulsion motors |
| 124 | Faulty tripping of propulsion motors by application controller                                        | 1.00E-05 | [6] | NA  | NA  | Propulsion motors |
| 125 | Application controller not controlling power increase                                                 | 1.00E-05 | [6] | NA  | NA  | Propulsion motors |
| 126 | Drive controller not reducing propulsion motors load during D/G sets overload conditions              | 1.00E-06 | [8] | NA  | NA  | Propulsion motors |
| 127 | Drive controller not timely reducing propulsion motors load during D/G sets overload conditions       | 1.00E-06 | [8] | NA  | NA  | Propulsion motors |
| 128 | Drive controller not controlling power increase                                                       | 1.00E-05 | [8] | NA  | NA  | Propulsion motors |

|     |                                                                          |          |            |     |            |                   |
|-----|--------------------------------------------------------------------------|----------|------------|-----|------------|-------------------|
| 129 | Temperature sensors on cycloconverter failure                            | 3.63E-06 | [1]        | NA  | NA         | Propulsion motors |
| 130 | Temperature sensors on winding of motors failure                         | 2.63E-07 | [1]        | NA  | NA         | Propulsion motors |
| 131 | Temperature sensors on cooling water system of propulsion motors failure | 2.63E-07 | [1]        | NA  | NA         | Propulsion motors |
| 132 | Temperature sensors on bearings of propulsion motors failure             | 2.63E-07 | [1]        | NA  | NA         | Propulsion motors |
| 133 | Speed sensors on propulsion motors failure                               | 2.63E-07 | [1]        | NA  | NA         | Propulsion motors |
| 134 | Radial bearings on motors failure                                        | 3.28E-07 | [1]        | 1.3 | [2]        | Propulsion motors |
| 135 | Propulsion motors air supply system failure                              | 2.63E-06 | [1]        | 1.2 | Assumption | Propulsion motors |
| 136 | Propulsion motors water cooling system failure                           | 2.30E-06 | [1]        | 1.2 | Assumption | Propulsion motors |
| 137 | Electrical motor failure                                                 | 4.38E-05 | [1]        | 1.2 | [2]        | Propulsion motors |
| 138 | Electrical motor shaft failure                                           | 1.00E-06 | Assumption | 2   | [2]        | Propulsion motors |
| 139 | Sealing on azipods failure                                               | 2.92E-05 | [21]       | 1.4 | [2]        | Propulsion motors |
| 140 | Load (current and voltage) sensors on azipods                            | 2.63E-07 | [1]        | NA  | NA         | Propulsion motors |
| 141 | Rectifier failure                                                        | 4.34E-06 | [1]        | 1   | No data    | Propulsion motors |
| 142 | Converter failure                                                        | 1.43E-04 | [1]        | 1   | No data    | Propulsion motors |



- [1] OREDA Participants. Offshore reliability data handbook. Norway, Hovik2015.
- [2] Toolkit RA. Failure rate estimates for mechanical components. 2018.
- [3] Ossai CI, Boswell B, Davies IJ. Estimation of internal pit depth growth and reliability of aged oil and gas pipelines—A Monte Carlo simulation approach. Corrosion. 2015;71:977-91.
- [4] Bukša A, Šegulja I, Tomas V. Ship Machinery Maintenance Concept Adjustment and Design. Strojarstvo: časopis za teoriju i praksu u strojarstvu. 2009;51:227-38.
- [5] Mihanović L, Komar I, Gržan M. Methodology analysis using exploitation reliability with the use of the RTOP main diesel engine. NAŠE MORE: znanstveno-stručni časopis za more i pomorstvo. 2016;63:48-55.
- [6] SINTEF. Reliability data for safety instrumented systems PDS Data Handbook2006.
- [7] Chai M, Reddy DB, Sobrayen L, Panda KS, Die W, Xiaoqing C. Improvement in efficiency and reliability for diesel- electric propulsion based marine vessels using genetic algorithm. 2016 IEEE Transportation Electrification Conference and Expo, Asia-Pacific (ITEC Asia-Pacific)2016. p. 180-4.
- [8] Aldemir T, Stovsky M, Kirschenbaum J, Mandelli D, Bucci P, Mangan L, et al. Dynamic reliability modeling of digital instrumentation and control systems for nuclear reactor probabilistic risk assessments. NUREG0CR-6942, US Nuclear Regulatory Commission. 2007.
- [9] Berghmans F, Eve S, Held M. An introduction to reliability of optical components and fiber optic sensors. Optical Waveguide Sensing and Imaging: Springer; 2008. p. 73-100.
- [10] ABB. Reliability calculation in accordance with RDF93 model from CNET. 2005.
- [11] Van Ta T, Thien DM, Cang VT. Marine Propulsion System Reliability Assesment by Fault Tree Analysis.
- [12] Dolas DR, Deshmukh S. Reliability Ananalysis of Cooling System of Diesel Engine. Universal Journal of Mechanical Engineering. 2015;3:57-62. [13] Anantharaman M, Khan F, Garaniya V, Lewarn B. Reliability of Fuel Oil System Components Versus Main Propulsion Engine: An Impact Assessment Study. Safety of Marine Transport: Marine Navigation and Safety of Sea Transportation. 2015:175.
- [14] Allal AA, Mansouri K, Youssfi M, Qbadu M. Toward a reliable sea water central cooling system for a safe operation of autonomous ship. International Journal of Industrial Electronics and Electrical Engineering. 2017;5:10.
- [15] IMO. Formal Safety Assessment - Cruise ships. 2008.
- [16] Nilsen OV. FSA for Cruise Ships - Task 4.1.1 - Hazid identification. 2005.
- [17] Siemens. Arcing faults in medium-voltage and low-voltage switchgear. 2013.
- [18] Aquilino JW. Report of transformer reliability survey-industrial plants and commercial buildings. IEEE transactions on industry applications. 1983:85866.
- [19] Schüller J, Brinkman J, Van Gestel PJ, Van Otterloo R. Methods for Determining and Processing Probabilities: Red Book: Committee for the Prevention of Disasters; 1997.
- [20] Jin X, Wang C, Chen C, Cheng T, Amancio A. Reliability analyses and calculations for distribution transformers. Transmission and Distribution Conference, 1999 IEEE: IEEE; 1999. p. 901-6.
- [21] Chybowski L, Idziaszczyk D, Wiśnicki B. A comparative components importance analysis of a complex technical system with the use of different importance measures. Systemy Wspomagania w Inżynierii Produkcji. 2014:23--33.
