# Supplementary material for: A Combinatorial Safety Analysis of Cruise Ship Diesel–Electric Propulsion Plant Blackout
Source: MDPI journal article supplement (doi:10.3390/safety7020038), 2021-05-14
Supplement: s1 [file s1]

Archive with 1 entries (1 files):
- safety-1127096-supplementary.pdf
